# Supplementary material
Source: PubMed Central journal article supplement (PMC4303624)
Supplement: ismej2014123x1.pdf [file ismej2014123x1.pdf]

### Supplemental data Figure S1

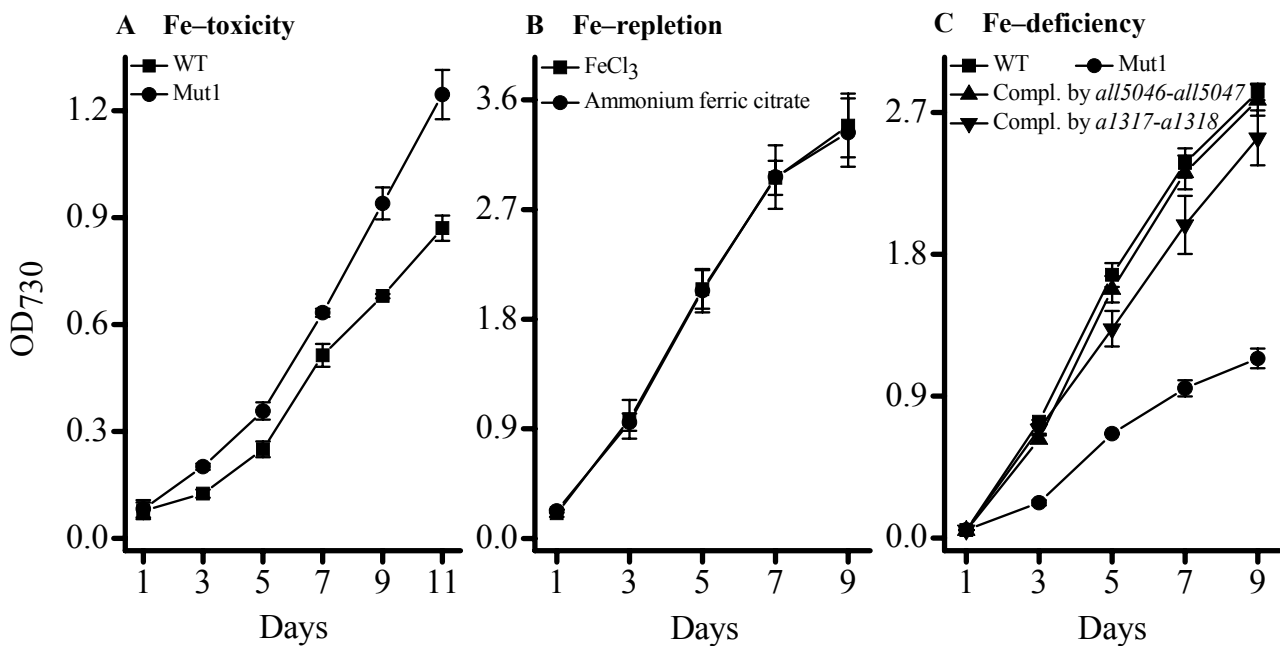

**Figure S1** Growth characteristics of *Synechocystis* 6803 wild type (WT),  $\Delta sl11404-1405$  mutant (Mut1) and strains complemented with *Anabaena* sp. PCC 7120 *exbBD* homologs (*all5046-all5047*) or *Synechococcus* sp. PCC 7002 *exbBD* homologs (*a1317-a1318*). Strains were cultured at 30 °C under continuous illumination of 40  $\mu\text{mol photons}\cdot\text{m}^{-2}\cdot\text{s}^{-1}$ . (A) WT and Mut1 cells were grown in BG11 medium supplemented with 1 mM ammonium ferric citrate. (B) WT cells were grown in YBG11 containing 2  $\mu\text{M}$  ammonium ferric citrate or 2  $\mu\text{M}$  FeCl<sub>3</sub> (replacing ammonium ferric citrate with the same concentration of FeCl<sub>3</sub> and omitting citric acid). (C) WT, Mut1 and complementation strains were cultured in iron-deficient BG11 medium (replacing ammonium ferric citrate with ammonium citrate).



### Supplemental data Figure S3

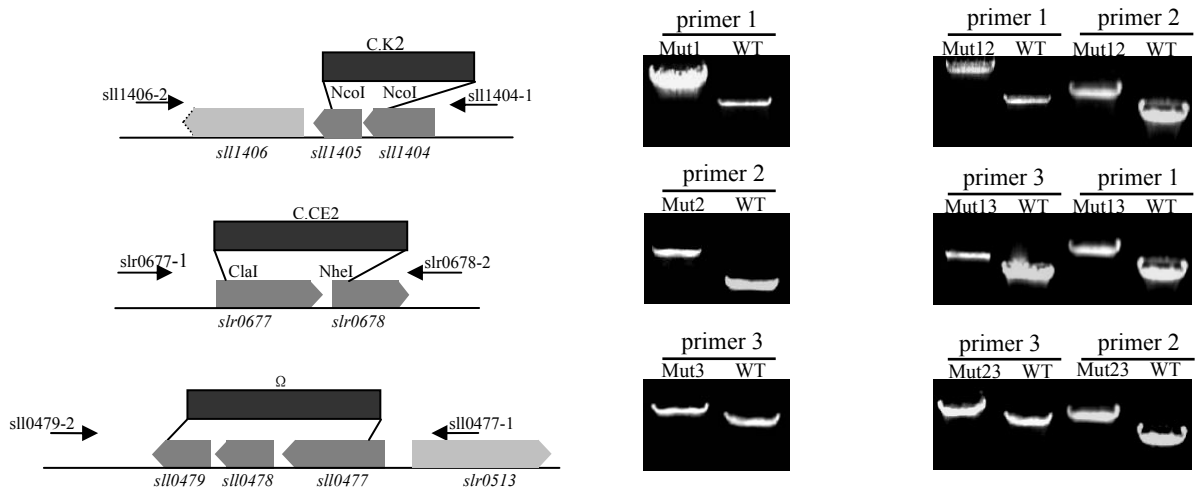

**Figure S3** PCR results, showing complete segregation of the three single mutants and three double mutants. Primer 1: *sll1404-1/sll1406-2*; primer 2: *slr0677-1/sl0678-2*; primer 3: *sll0477-1/sll0479-2*. The primers used are listed in Table S2.

## Supplemental data Table S1

**Table S1** Strains, plasmids and primers used in this study.

| Strains, plasmids and primers          | Derivation and / or relevant characteristics <sup>a</sup>                                                                                      | Reference(s) or source |
|----------------------------------------|------------------------------------------------------------------------------------------------------------------------------------------------|------------------------|
| <b><i>Synechocystis</i> strains</b>    |                                                                                                                                                |                        |
| PCC6803                                | Wild type                                                                                                                                      | This study             |
| Mut1                                   | Km <sup>r</sup> , <i>Synechocystis</i> 6803 mutant, result of transformation with pHS036                                                       | This study             |
| Mut2                                   | Em <sup>r</sup> , <i>Synechocystis</i> 6803 mutant, result of transformation with pHS178                                                       | This study             |
| Mut3                                   | Sp <sup>r</sup> , <i>Synechocystis</i> 6803 mutant, result of transformation with pHS205                                                       | This study             |
| Mut12                                  | Km <sup>r</sup> Em <sup>r</sup> , <i>Synechocystis</i> 6803 mutant, result of transformation with pHS036 and pHS178                            | This study             |
| Mut13                                  | Km <sup>r</sup> Sp <sup>r</sup> , <i>Synechocystis</i> 6803 mutant, result of transformation with pHS036 and pHS205                            | This study             |
| Mut23                                  | Em <sup>r</sup> Sp <sup>r</sup> , <i>Synechocystis</i> 6803 mutant, result of transformation with pHS178 and pHS205                            | This study             |
| Mut123                                 | Km <sup>r</sup> Em <sup>r</sup> Sp <sup>r</sup> , <i>Synechocystis</i> 6803 mutant, result of transformation with pHS036, pHS178 and pHS205    | This study             |
| WT(Ω-PsbAII-SII0477-flag)              | Sp <sup>r</sup> , Omega-P <sub>psbAII-sII0477</sub> -flag integrated into <i>slr0168</i> in the genome of <i>Synechocystis</i> wild type       | This study             |
| WT(Ω-PsbAII-Slr0678-flag)              | Sp <sup>r</sup> , Omega-P <sub>psbAII-slr0678</sub> -flag integrated into <i>slr0168</i> in the genome of <i>Synechocystis</i> wild type       | This study             |
| Mut1(Ω-PsbAII-SII1404-SII1405)         | Sp <sup>r</sup> , Omega-P <sub>psbAII-sII1404-sII1405</sub> integrated into <i>slr0168</i> in the genome of <i>Synechocystis</i> Mut1          | This study             |
| Mut1(Ω-PsbAII-Slr0677-Slr0678)         | Sp <sup>r</sup> , Omega-P <sub>psbAII-slr0677-slr0678</sub> integrated into <i>slr0168</i> in the genome of <i>Synechocystis</i> Mut1          | This study             |
| Mut1(Ω-PsbAII-SII0477-SII0478-SII0479) | Sp <sup>r</sup> , Omega-P <sub>psbAII-sII0477-sII0478-sII0479</sub> integrated into <i>slr0168</i> in the genome of <i>Synechocystis</i> Mut1  | This study             |
| Mut2(Ω-PsbAII-SII1404-SII1405)         | Sp <sup>r</sup> , Omega-P <sub>psbAII-sII1404-sII1405</sub> integrated into <i>slr0168</i> in the genome of <i>Synechocystis</i> Mut2          | This study             |
| Mut2(Ω-PsbAII-Slr0677-Slr0678)         | Sp <sup>r</sup> , Omega-P <sub>psbAII-slr0677-slr0678</sub> integrated into <i>slr0168</i> in the genome of <i>Synechocystis</i> Mut2          | This study             |
| Mut2(Ω-PsbAII-SII0477-SII0478-SII0479) | Sp <sup>r</sup> , Omega-P <sub>psbAII-sII0477-sII0478-sII0479</sub> integrated into <i>slr0168</i> in the genome of <i>Synechocystis</i> Mut2  | This study             |
| Mut1(Ω-PsbAII-AII5046-AII5047)         | Sp <sup>r</sup> , Omega-P <sub>psbAII-aII5046-aII5047</sub> integrated into <i>slr0168</i> in the genome of <i>Synechocystis</i> Mut1          | This study             |
| Mut1(Ω-PsbAII-A1317-A1318)             | Sp <sup>r</sup> , Omega-P <sub>psbAII-a1317-a1318</sub> integrated into <i>slr0168</i> in the genome of <i>Synechocystis</i> Mut1              | This study             |
| <b>Yeast strains</b>                   |                                                                                                                                                |                        |
| Y187                                   | <i>MATa, ura3-52, his3-200, ade2-101, trp1-901, leu2-3, 112, gal4Δ, met-, gal80, URA::GAL I<sub>USI</sub>-GAL ITATA-LacZ</i>                   | Harper et al. (1993)   |
| Y187 (pGKT7-SII1404/pGADT7-SII1405)    | Ap <sup>r</sup> Km <sup>r</sup> , Y187 transformed with pHS635 and pHS636                                                                      | This study             |
| <b>Plasmids</b>                        |                                                                                                                                                |                        |
| pHS036                                 | Ap <sup>r</sup> Km <sup>r</sup> , PCR fragment containing <i>sII1404-sII1405</i> cloned into pMD18T, and C.K2 inserted in its <i>NcoI</i> site | This study             |
| pHS 175                                | Ap <sup>r</sup> Km <sup>r</sup> , PCR fragment containing <i>sII0477</i> cloned into pMD18T                                                    | This study             |
| pHS 176                                | Ap <sup>r</sup> Km <sup>r</sup> , PCR fragment containing <i>sII0479</i> cloned into pMD18T                                                    | This study             |
| pHS 178                                | Ap <sup>r</sup> Cm <sup>r</sup> , PCR fragment containing <i>slr0677-slr0678</i> cloned into pMD18T, which was excised by <i>Clal</i>          | This study             |

and *NheI* and then inserted by C.CE2

|         |                                                                                                                                                                      |                       |
|---------|----------------------------------------------------------------------------------------------------------------------------------------------------------------------|-----------------------|
| pHS 205 | Ap <sup>r</sup> Sp <sup>r</sup> , an omega drug, linked to the <i>HindIII</i> endonucleases side of plasmid pHS175                                                   | This study            |
| pHS 208 | Ap <sup>r</sup> Sp <sup>r</sup> , the DNA fragment digested from the pHS176 with <i>PstI</i> and <i>BamHI</i> , was cloned to the <i>XbaI</i> side of pHS205         | This study            |
| pHS 211 | Ap <sup>r</sup> , PCR fragment containing the <i>psbAII</i> promoter region was cloned into pBluescript II SK(-)                                                     | Jiang et al. (2012)   |
| pHS 215 | Ap <sup>r</sup> Sp <sup>r</sup> omega cassette from pRL57 inserted into pHS 211 at the <i>Clal</i> site                                                              | Jiang et al. (2012)   |
| pHS 298 | Ap <sup>r</sup> Sp <sup>r</sup> , <i>PpsbAII</i> expression vector, Omega-P <sub><i>psbAII</i></sub> from pHS215 inserted into Platform0168 at the <i>EcoRI</i> site | Jiang et al. (2012)   |
| pHS 431 | Ap <sup>r</sup> Sp <sup>r</sup> , the <i>sll0477</i> -flag fragment was cloned to the <i>PpsbAII</i> expression vector, pHS298                                       | This study            |
| pHS 433 | Ap <sup>r</sup> Sp <sup>r</sup> , the <i>sll0477-sll0478-sll0479</i> -flag fragment was cloned to the <i>PpsbAII</i> expression vector, pHS298                       | This study            |
| pBAD24  | Ap <sup>r</sup> , <i>araBAD</i> promoter, AraC                                                                                                                       | Guzman et al. (1995)  |
| pHS 503 | Ap <sup>r</sup> , the PCR <i>sll1404-sll1405</i> the <i>NdeI</i> side of pBAD24                                                                                      | This study            |
| pRL 446 | Km <sup>r</sup> , a cloning vector with a kanamycin resistance marker (C.K2)                                                                                         | Elhai and Wolk (1988) |
| pRL 57  | Sp <sup>r</sup> , cloning vector with a spectinomycin resistance cassette omega                                                                                      | Black et al. (1993)   |
| pRL 598 | Cm <sup>r</sup> Em <sup>r</sup> , cloning vector with a erythromycin resistance marker (C.CE2)                                                                       | Elhai and Wolk (1988) |
| pHS 635 | Km <sup>r</sup> , the <i>sll1404</i> fragment was cloned into the pGKT7 vector                                                                                       | This study            |
| pHS 636 | Ap <sup>r</sup> , the <i>sll1405</i> fragment was cloned into the pGADT7 vector                                                                                      | This study            |
| pHS 791 | Ap <sup>r</sup> Sp <sup>r</sup> , the <i>all5046-all5047</i> fragment was cloned to the <i>PpsbAII</i> expression vector, pHS298                                     | This study            |
| pHS 792 | Ap <sup>r</sup> Sp <sup>r</sup> , the <i>a1317-a1318</i> fragment was cloned to the <i>PpsbAII</i> expression vector, pHS298                                         | This study            |
| pGADT7  | Ap <sup>r</sup> , Yeast two-hybrid expression vector with ADH1 promoter and a fusion of GAL4 AD                                                                      | Clontech              |
| pGBKT7  | Km <sup>r</sup> , Yeast two-hybrid expression vector a fusion of GAL4 DNA binding domain (DNA-BD).                                                                   | Clontech              |

#### Primers

|              |                                                    |
|--------------|----------------------------------------------------|
| sll1404-1    | 5'-GTGTGACTTCTGGGATGGGAG-3'                        |
| sll1406-2    | 5'-TGGTGCTGGGATGCCTTCAT-3'                         |
| slr0677-1    | 5'-CCACTATTACCCACGCATTGGA-3'                       |
| slr0678-2    | 5'-TGCAAAGCCCGTCAATGGC-3'                          |
| sll0477-1    | 5'-GTGAAGCCATACCATAGCCCAT-3'                       |
| sll0477-2    | 5'-AAGGGCAAGGATGGACAGCAGT-3'                       |
| sll0479-1    | 5'-TTGAAGGAAGTGGGCGGTGA-3'                         |
| sll0479-2    | 5'-GGACTGACAGCACCTTTGGC-3'                         |
| slr1484-1    | 5'-GAGGAGGGGCACCGCCACT-3'                          |
| slr1484-2    | 5'-AGGGATTGATGACCCAGGGAA-3'                        |
| slr0677com-1 | 5'-TGGTGAATCCCATTGAGTTGATGCAAAAGGG-3'              |
| slr0678com-2 | 5'-TTACTTGTCTGCTGCTCCTTGTAGTCCTGTTGGGGGGCAGTGGG-3' |
| sll0477com-1 | 5'-TGCTGGATAATTGCAAGAG-3'                          |

|              |                                                    |
|--------------|----------------------------------------------------|
| sll0479com-2 | 5'-TCACTTGTCTCGTCGTCCTTGTAGTCAGGCATGGCCCCAGCACC-3' |
| exbB-1       | 5'-TGGGTAATAATTTAATGCAGACGGACC-3'                  |
| exbD-2       | 5'-TTACTTCGCTTTGGCGGTTTCTTCG-3'                    |
| all5046-1    | 5'-CATATGGGAATCCAAAATCTTTTTGC-3'                   |
| all5047-2    | 5'-CATATGTTAACGTTTTTGTAGTGGCGAT-3'                 |
| a1317-1      | 5'-CATATGTGGCCCTTAGTACTCTTGTC-3'                   |
| a1318-2      | 5'-CATATG CTATTGCTGATTATTTGTAACT-3'                |
| psbAIIoe-1   | 5'-GCGTGCAAGGCCAGTGATC-3'                          |
| psbAIIoe-2   | 5'-CATATGGTTATAATTCCTTAGTTCAGATTGGAAGTAACTTAGTC-3' |
| sll1404Y2H-1 | 5'-CATATGGCCGGGGCATAAGTGG-3'                       |
| sll1404Y2H-2 | 5'-CTCGAGTCATCGGGAAGTCGCATACTC-3'                  |
| sll1405YH-1  | 5'-CATATGACCAACCGGAGGAAAAAGAG-3'                   |
| sll1405YH-2  | 5'-CTCGAGTTAGTCTTGGGCGTGGCG-3'                     |
| mpB-1        | 5'-TTAGTTCTTGGGCGTGGCG-3'                          |
| mpB-2        | 5'-TTGCCCTCCGACCTTGCTT-3'                          |
| sll1263-1    | 5'-CCAAGTTCGTGCTTTATCCGC-3'                        |
| sll1263-2    | 5'-ACCACAGCCACCGCAATCAGC -3'                       |
| sll1404RT-1  | 5'-CGAGCGTGCCTATTTTTGGAGT-3'                       |
| sll1404RT-2  | 5'-TGTCCCCAGTAAGCCCAGGA-3'                         |
| slr0677RT-1  | 5'-AGAGGTTGTGGTTTTGGGGC-3'                         |
| slr0677RT-2  | 5'-TGGGTGGGGCAAACGCA-3'                            |
| sll0477RT-1  | 5'-CGGAGGCTACCCAGGC-3'                             |
| sll0477RT-2  | 5'-ATTCACTGCCCACTGCGG-3'                           |
| slr1484RT-1  | 5'-ACAGCCCGTATTTGGTCGC-3'                          |
| slr1484RT-2  | 5'-CTGGGAGTTGGTTTCGGTTT-3'                         |
| slr0513RT-1  | 5'-TCACGGCATTACAACACCGA-3'                         |
| slr0513RT-2  | 5'-TCTGGGTGAAGCCATACCAT-3'                         |
| slr0327RT-1  | 5'-TCTCACCGTTTCCTATGCCCA-3'                        |
| slr0327RT-2  | 5'-ACCACTCAGCAGAAGACCAA-3'                         |
| slr1295RT-1  | 5'-CCAAAAGTTATCCCGTCGCCT-3'                        |
| slr1295RT-2  | 5'-ACGAGCCAAATCCACTGTGA-3'                         |
| sll1878RT-1  | 5'-CGCTATCCCCACGAACTATCC-3'                        |
| sll1878RT-2  | 5'-GCCACAAAACGGGAAGCAGG-3'                         |
| slr1392RT-1  | 5'-GTGGTGGTGAACGCTGCCCA-3'                         |
| slr1392RT-2  | 5'-CACGGGGTGATCGGAAAGA-3'                          |

---

<sup>a</sup> Ap, ampicillin; Km, kanamycin; Sp, spectinomycin; Cm, chloramphenicol; Em, erythromycin.

## References

- Black T, Cai Y, Wolk CP (1993) Spatial expression and autoregulation of *hetR*, a gene involved in the control of heterocyst development in *Anabaena*. *Mol. Microbiol* 9: 77–84.
- Elhai J, Wolk CP (1988) A versatile class of positive-selection vectors based on the nonviability of palindrome-containing plasmids that allows the cloning into long polylinkers. *Gene* 68: 119–138.
- Guzman LM, Belin D, Carson MJ, Beckwith J (1995) Tight regulation, modulation, and high-level expression by vectors containing the arabinose PBAD promoter. *J Bacteriol* 177: 4121–413.
- Harper JW, Adami GR, Wei N, Keyomarsi K, Elledge SJ (1993) The p21 Cdk-interacting protein Cip1 is a potent inhibitor of G1 cyclin-dependent kinases. *Cell* 75: 805–816.
- Jiang HB, Lou WJ, Du HY, Price NM, Qiu BS (2012) Sll1263, a unique cation diffusion facilitator protein that promotes iron uptake in the cyanobacterium *Synechocystis* sp. strain PCC 6803. *Plant Cell Physiol* 53: 1404–1417.
